# Supplementary material for: No evidence from complementary data sources of a direct glutamatergic projection from the mouse anterior cingulate area to the hippocampal formation
Source: eLife. 2023 Aug 7;12:e77364. doi: 10.7554/eLife.77364 (PMC10425170; doi:10.7554/eLife.77364)
Supplement: Figure 1—source data 1. [file elife-77364-fig1-data1.xlsx]

## Sheet: Sheet1
			Coordinates
		Mouse ID	A/P	M/L	D/V	Injection site	Deep cortical projections (MCC and RSC)	Claustrum	Hippocampus	Thalamus
	1	m181205-01	1	0.35	1.2	ACC/M2	+	+	-	+
	2	m181205-02	1	0.35	1.2	ACC/M2	+	-	-	+
	3	m181205-03	1	0.35	1.2	ACC/M2	+	+	-	+
	4	m190401-05	1	0.2	1.3	ACC	+	+	-	+
	5	m190401-06	1	0.2	1.3	ACC	+	+	-	+
	6	m190401-07	1	0.2	1.3	ACC	+	+	-	+
	7	m190412-01	1.75	0.20	1.50	ACC	+	+	-	+
	8	m190412-02	1.75	0.20	1.50	ACC	+	+	-	+
	9	m190412-03	1.75	0.20	1.50	ACC	+	+	-	+
	10	m190412-04	1.75	0.20	1.50	ACC	+	+	-	+
	11	m190412-05	1.75	0.20	1.50	ACC	+	+	-	+
	12	m190412-07	1.75	0.20	1.50	ACC	+	+	-	+
	13	m190415-01	1.75	0.20	1.50	ACC	+	+	-	+
	14	m190415-02	1.75	0.20	1.50	ACC	+	+	-	+
	15	m190415-03	1.75	0.20	1.50	ACC	+	+	-	+
	16	m190415-04	1.75	0.20	1.50	ACC	+	+	-	+
	17	m190415-05	1.75	0.20	1.50	ACC	+	+	-	+
	18	m190415-06	1.75	0.20	1.50	ACC	+	+	-	+
	19	m190415-07	1.75	0.20	1.50	ACC	+	+	-	+
	20	m190415-08	1.75	0.20	1.50	ACC	+	+	-	+
	21	m200115-01	1.75	0.25	1.75	ACC	+	+	-	+
	22	m200115-02	1.75	0.25	1.75	ACC	+	+	-	+
	23	m200115-03	1.75	0.25	1.75	ACC	+	+	-	+
	24	m200115-04	1.75	0.25	1.75	ACC	+	+	-	+
	25	m200117-03	1.75	0.25	2	PFC/ACC	+	+	-	+
	26	m200117-04	1.75	0.25	2	PFC/ACC	+	+	-	+
	27	m200117-05	1.75	0.25	2	PFC/ACC	+	+	-	+
	28	m20030501-1	1.75	0.25	1.75	ACC	+	+	-	+
	29	m20030501-2	1.75	0.25	1.75	ACC	+	+	-	+
	30	m20030501-3	1.75	0.25	1.75	ACC	+	+	-	+
